# Supplementary material for: Constructing a bifunctional MoO2/Co heterojunction for efficient electrocatalytic hydrogen evolution and hydrazine oxidation
Source: Royal Society of Chemistry journal article supplement (doi:10.1039/d2ta03659b), 2022-01-01
Supplement: d2ta03659b1.pdf [file d2ta03659b1.pdf]

## **Constructing a bifunctional MoO<sub>2</sub>/Co heterojunction for efficient electrocatalytic hydrogen evolution and hydrazine oxidation**

Yuhao Guo,<sup>a</sup> Xiaolei Liu,<sup>a</sup> Yanmei Zang,<sup>b</sup> Yaqiang Wu,<sup>a</sup> Qianqian Zhang,<sup>a</sup> Zeyan Wang,<sup>a</sup> Yuanyuan Liu,<sup>a</sup> Zhaoke Zheng,<sup>a</sup> Hefeng Cheng,<sup>a</sup> Baibiao Huang,<sup>a</sup> Ying Dai,<sup>b</sup> Peng Wang,<sup>a,\*</sup>

<sup>a</sup> State Key Lab of Crystal Materials, Shandong University, Jinan 250100, China

<sup>b</sup> School of Physics, Shandong University, Jinan 250100, China

\*Corresponding author's e-mail address: pengwangicm@sdu.edu.cn (P. Wang)

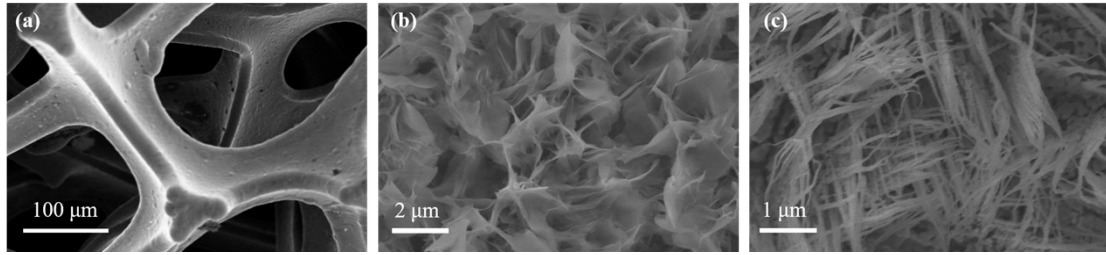

**Figure. S1** SEM images of bare NF (a), CoMo precursor (b) and Co (c).

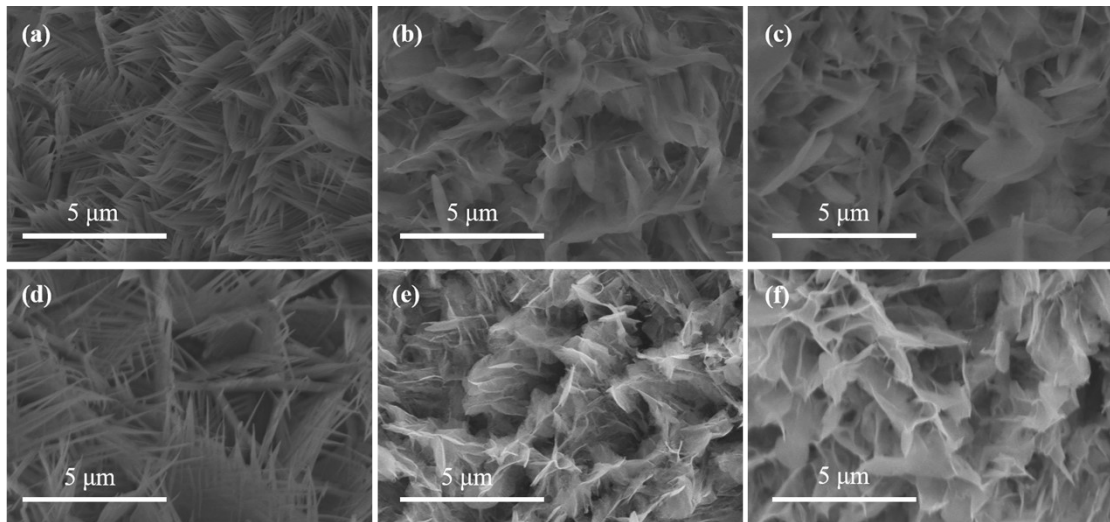

**Figure. S2** SEM images of CoMo precursor-1h (a), CoMo precursor-3h (b), CoMo precursor-6h (c), MoO<sub>2</sub>/Co-1h (d), MoO<sub>2</sub>/Co-3h (e) and MoO<sub>2</sub>/Co-6h (f).

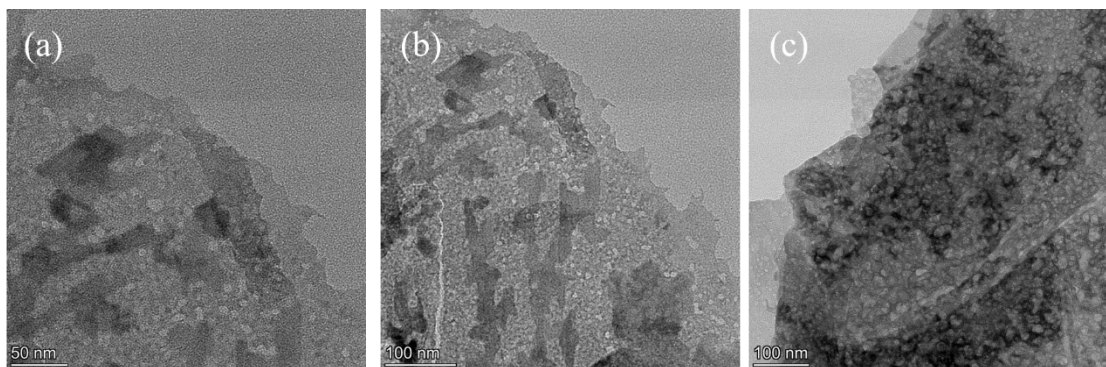

**Figure. S3** TEM images of MoO<sub>2</sub>/Co.

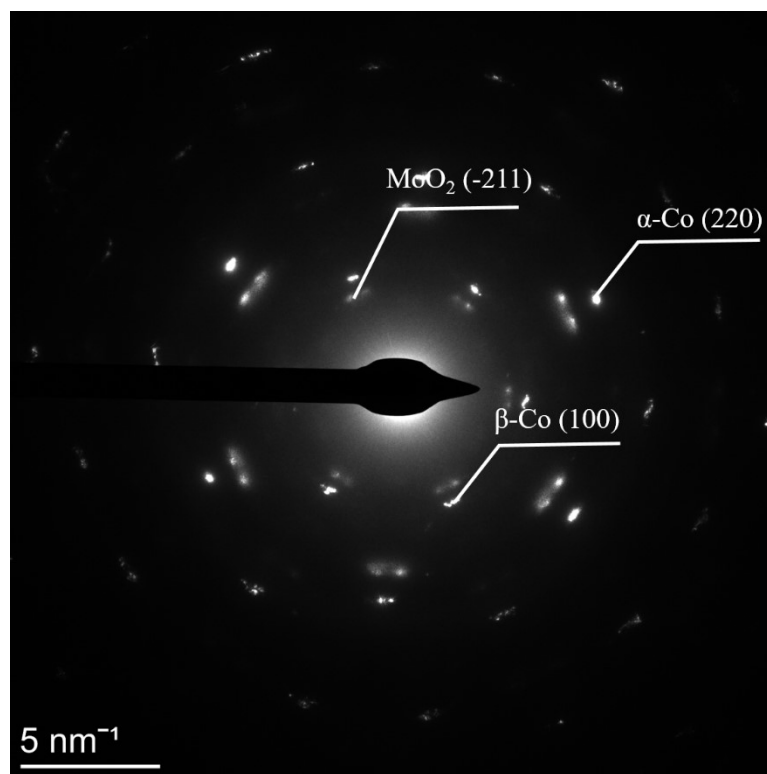

Figure. S4 SAED pattern of MoO<sub>2</sub>/Co.

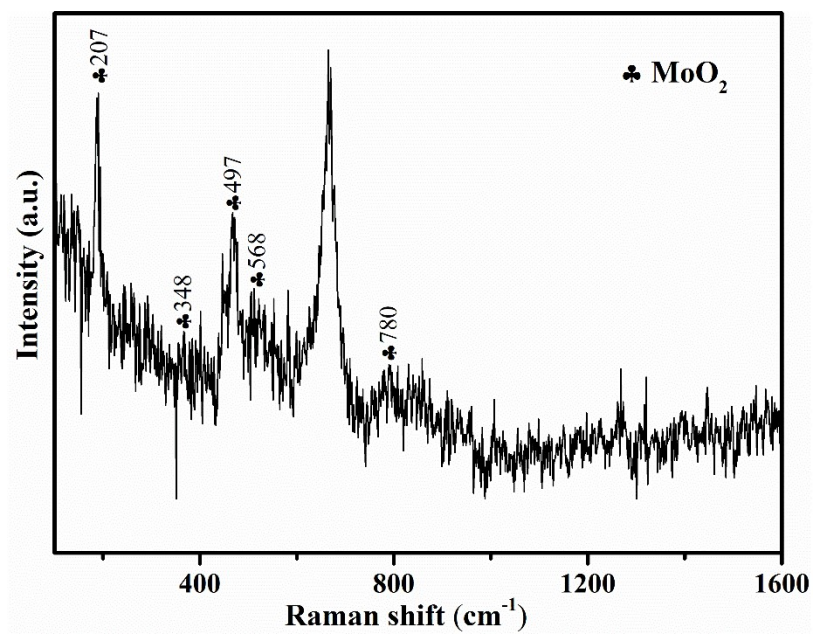

Figure. S5 Raman spectrum of MoO<sub>2</sub>/Co.

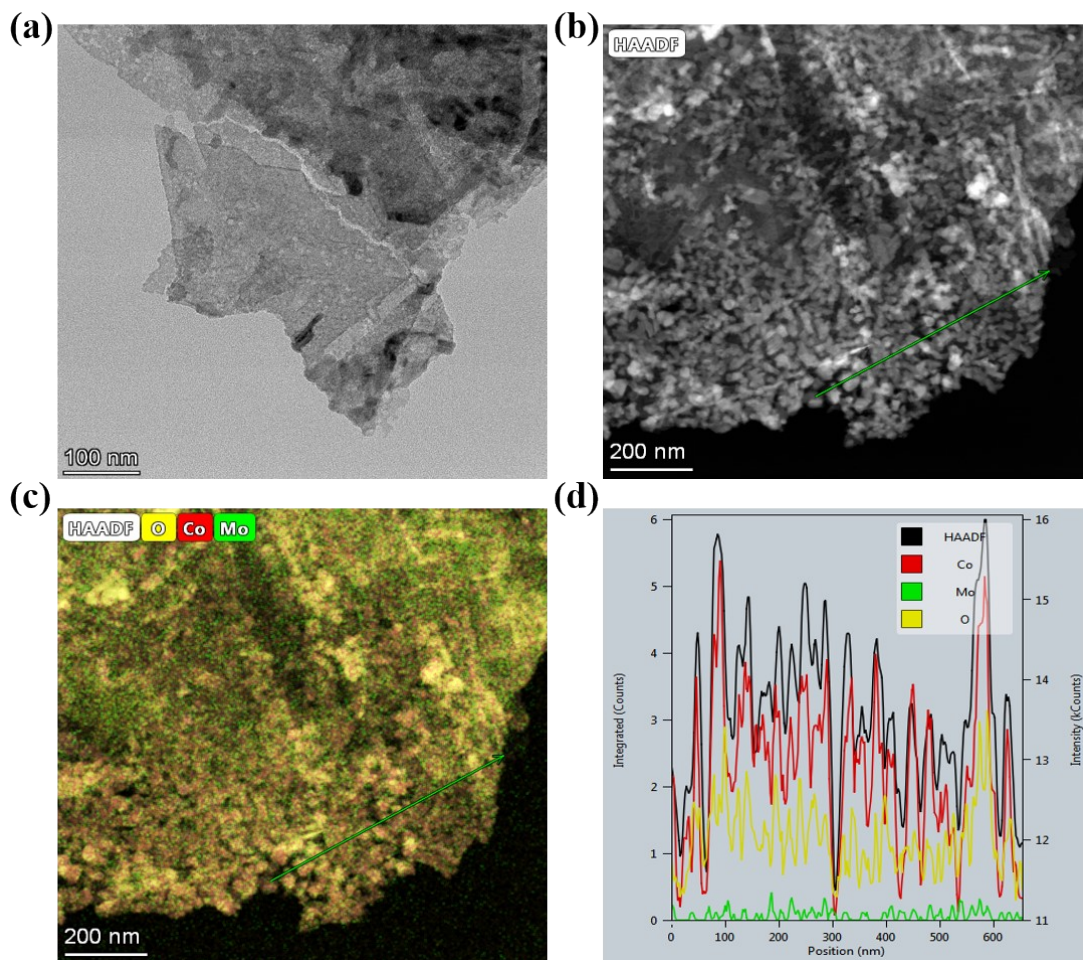

**Figure. S6** (a) TEM image of MoO<sub>2</sub>/Co; (b-d) EDS line scanning images of MoO<sub>2</sub>/Co.

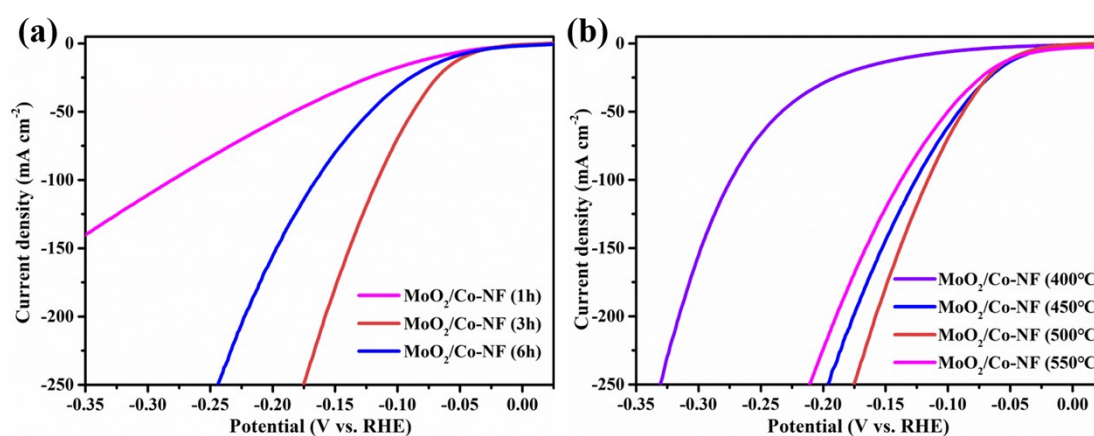

**Figure. S7** LSV curves of MoO<sub>2</sub>/Co-NF with different hydrothermal times (a) and different hydrogenation temperatures (b) in 1.0 M KOH solution.

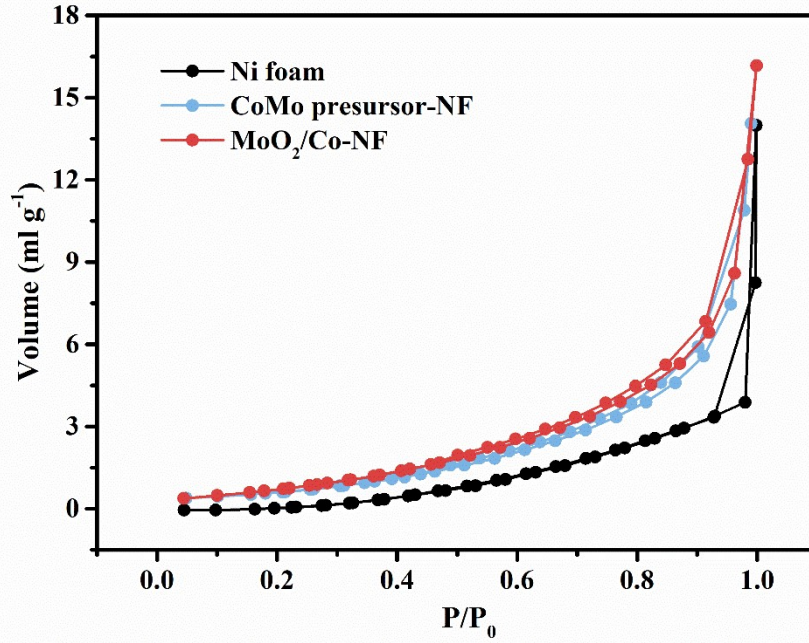

**Figure. S8** BET results of the Ni foam, CoMo precursor-NF and MoO<sub>2</sub>/Co-NF electrodes (sample: active material together with Ni foam substrate).

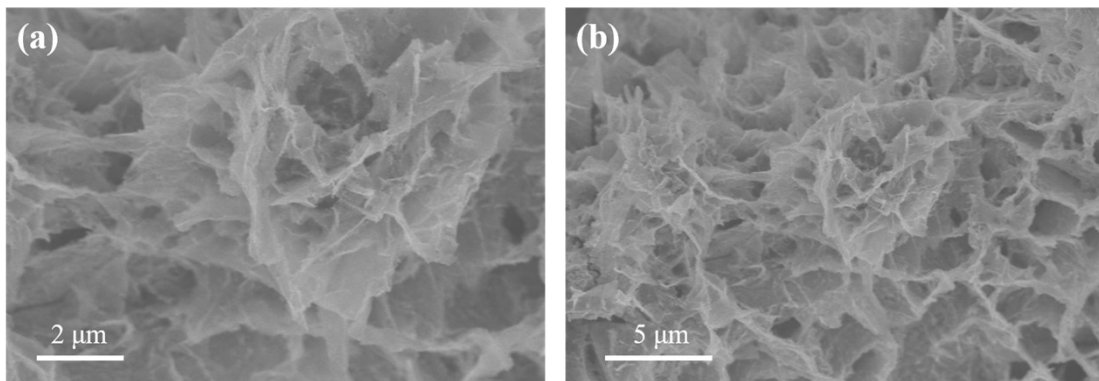

**Figure. S9** SEM images of MoO<sub>2</sub>/Co after 3000 cycles for HER.

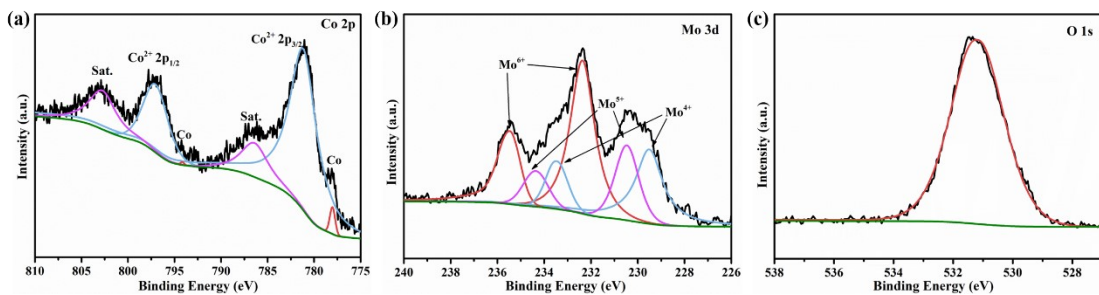

**Figure. S10** XPS survey spectra of MoO<sub>2</sub>/Co after 3000 cycles for HER.

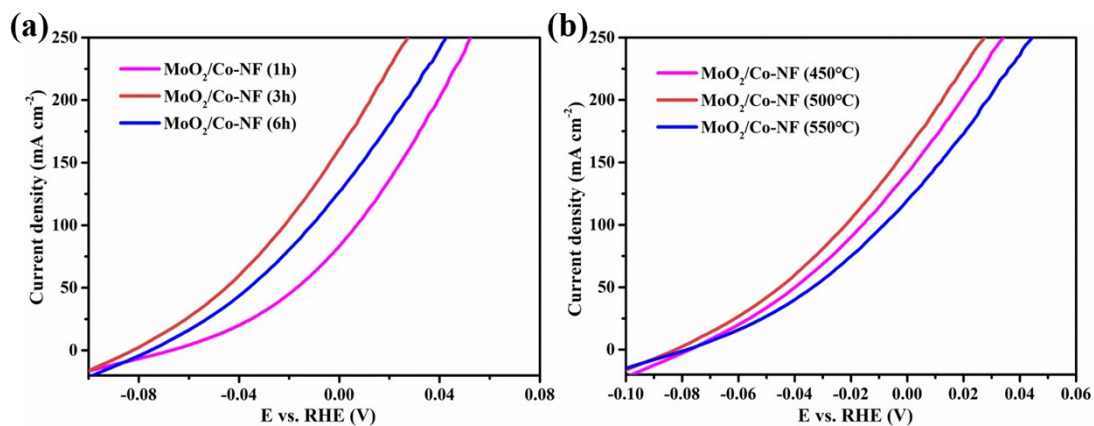

**Figure. S11** LSV curves of MoO<sub>2</sub>/Co-NF with different hydrothermal times (a) and different hydrogenation temperatures (b) in 1.0 M KOH with 0.5 M N<sub>2</sub>H<sub>4</sub> solution.

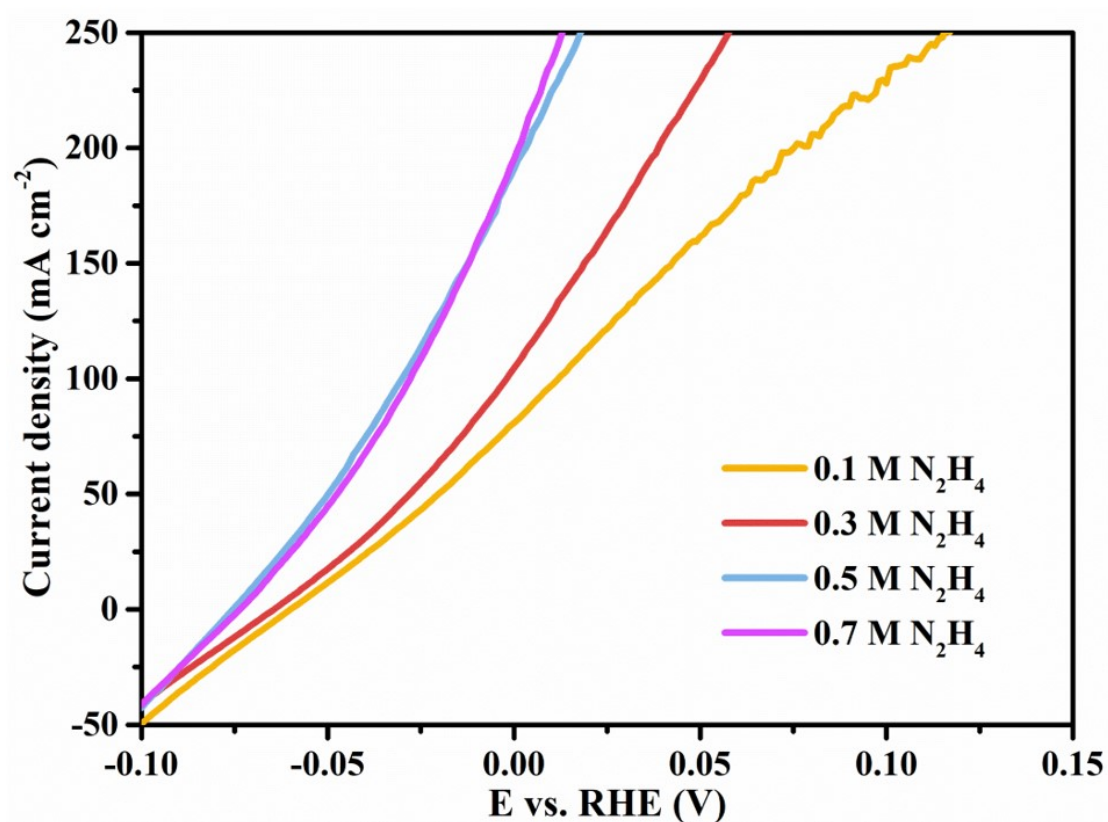

**Figure. S12** LSV curves of MoO<sub>2</sub>/Co-NF with different concentrations of N<sub>2</sub>H<sub>4</sub> in 1M KOH.

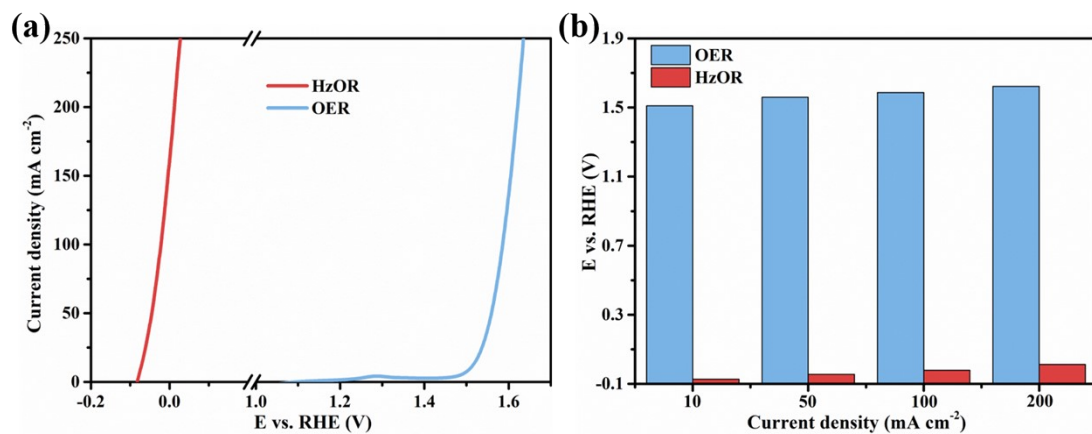

**Figure. S13** LSV curves (a) and potentials (b) of MoO<sub>2</sub>/Co-NF for OER and HzOR.

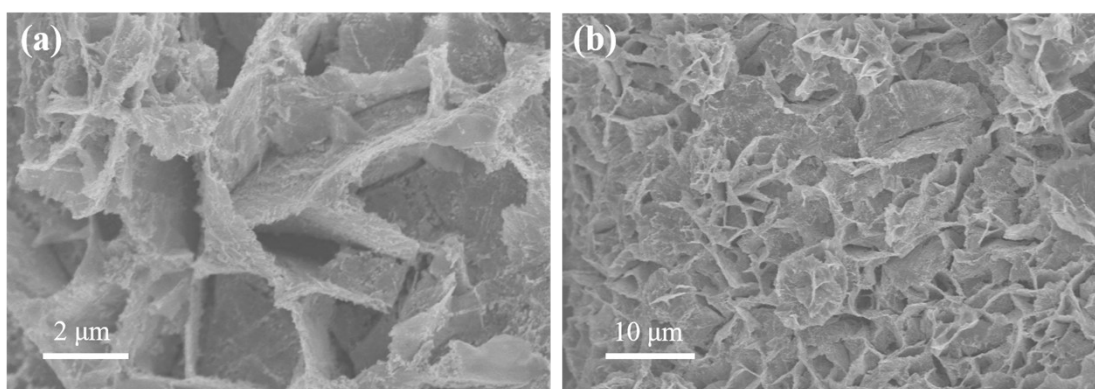

**Figure. S14** SEM images of MoO<sub>2</sub>/Co after 3000 cycles for HzOR.

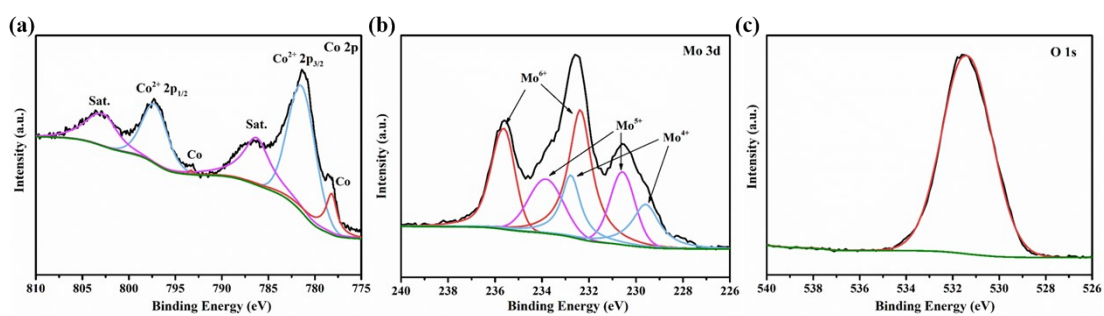

**Figure. S15** XPS survey spectra of MoO<sub>2</sub>/Co after 3000 cycles for HzOR.

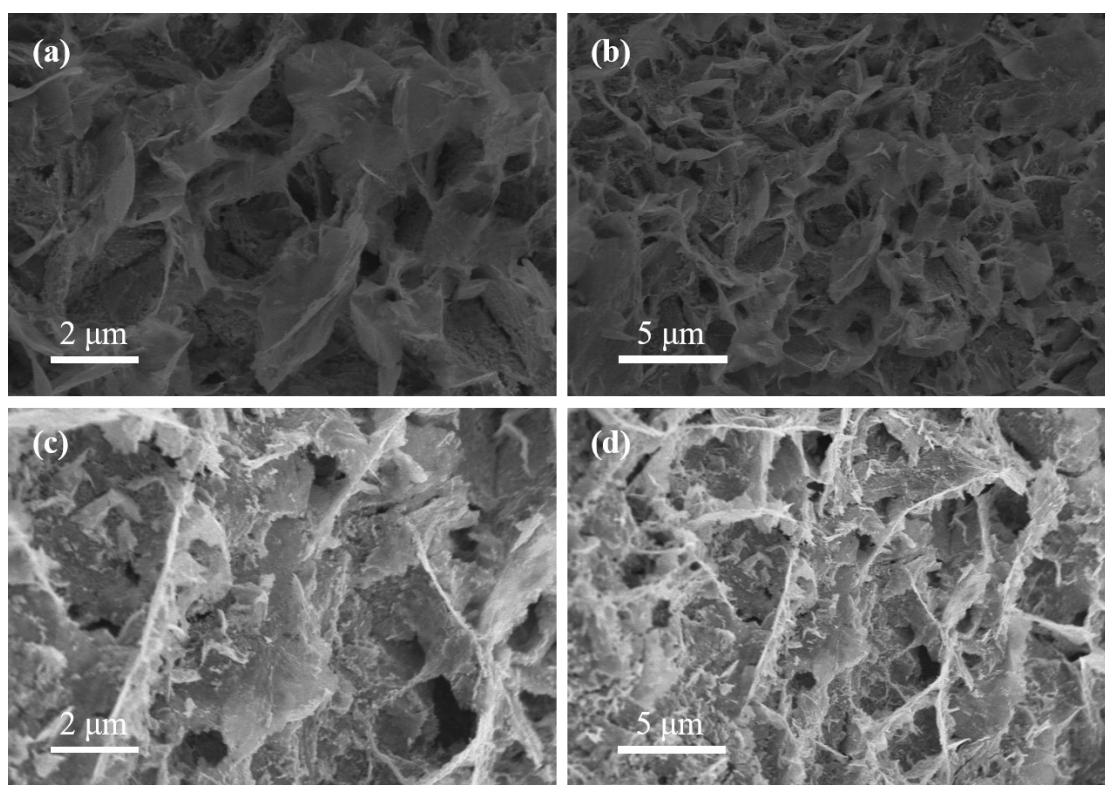

**Figure. S16** SEM images of MoO<sub>2</sub>/Co after 50 hours stability test for HER (a,b) and HzOR (c,d).

**Table. S1** The element Inductive Coupled Plasma (ICP) characterization after different hydrothermal time.

| Sample                  | Co/Mo (at.) |
|-------------------------|-------------|
| MoO <sub>2</sub> /Co-1h | 19.94:1     |
| MoO <sub>2</sub> /Co-3h | 5.558:1     |
| MoO <sub>2</sub> /Co-6h | 4.076:1     |



**Table. S2** Comparison of HER activity in 1 M KOH for MoO<sub>2</sub>/Co with other recently reported HER electrocatalysts.

| Catalysts                          | $\eta_{10}$ | Tafel slope (mV dec <sup>-1</sup> ) | Reference |
|------------------------------------|-------------|-------------------------------------|-----------|
| MoO <sub>2</sub> /Co-NF            | 48          | 49.5                                | This work |
| Co <sub>2</sub> P/CoN-in-NCNTs     | 98          | 57.0                                | [1]       |
| Fe-CoS <sub>2</sub>                | 40          | 32                                  | [2]       |
| NiCoN/C                            | 103         | N/A                                 | [3]       |
| V-Co <sub>4</sub> N                | 37          | 44                                  | [4]       |
| PW-Co <sub>3</sub> N               | 41          | 40                                  | [5]       |
| CoSe <sub>2</sub>                  | 79          | 84                                  | [6]       |
| Cr-Co <sub>4</sub> N               | 21          | 38.1                                | [7]       |
| Co-Ni <sub>3</sub> N               | 194         | 156                                 | [8]       |
| Ni <sub>3</sub> N/MoO <sub>2</sub> | 21          | 46                                  | [9]       |
| MoO <sub>2</sub> /Ni               | 50.48       | 65.52                               | [10]      |
| MoO <sub>2</sub> -Ni NWs           | 58.4        | 36.6                                | [11]      |

**Table. S3** Comparison of the HzOR performance of MoO<sub>2</sub>/Co with other recently reported advanced catalysts. E<sub>10</sub> is the HzOR working potential at 10 mA cm<sup>-2</sup>.

| Catalysts                           | Electrolyte                                   | E <sub>10</sub><br>(mV) | Tafel slope<br>(mV dec <sup>-1</sup> ) | Reference |
|-------------------------------------|-----------------------------------------------|-------------------------|----------------------------------------|-----------|
| MoO <sub>2</sub> /Co-NF             | 1.0 M KOH+0.5 M N <sub>2</sub> H <sub>4</sub> | -73                     | 22.9                                   | This work |
| PW-Co <sub>3</sub> N                | 1.0 M KOH+0.1 M N <sub>2</sub> H <sub>4</sub> | -55                     | 14                                     | [5]       |
| Fe-CoS <sub>2</sub>                 | 1.0 M KOH+0.1 M N <sub>2</sub> H <sub>4</sub> | -5                      | 48                                     | [2]       |
| CoSe <sub>2</sub>                   | 1.0 M KOH+0.5 M N <sub>2</sub> H <sub>4</sub> | -17                     | N/A                                    | [6]       |
| Ni NCNAs                            | 1.0 M KOH+0.3 M N <sub>2</sub> H <sub>4</sub> | -26                     | 32.6                                   | [12]      |
| Mo-Ni <sub>3</sub> N/Ni/NF          | 1.0 M KOH+0.1 M N <sub>2</sub> H <sub>4</sub> | -0.3                    | 48                                     | [13]      |
| Ni <sub>3</sub> N-Co <sub>3</sub> N | 1.0 M KOH+0.1 M N <sub>2</sub> H <sub>4</sub> | -88                     | 21.6                                   | [14]      |
| RP-CPM                              | 1.0 M KOH+0.3 M N <sub>2</sub> H <sub>4</sub> | -70                     | 47.6                                   | [15]      |
| Ni <sub>2</sub> P/NF                | 1.0 M KOH+0.5 M N <sub>2</sub> H <sub>4</sub> | -65                     | 55                                     | [16]      |
| Ni-C HNSA                           | 1.0 M KOH+0.1 M N <sub>2</sub> H <sub>4</sub> | -20                     | 16.2                                   | [17]      |

**Table. S4** Comparison of OHzS of MoO<sub>2</sub>/Co with other reported catalysts. E<sub>10</sub> is the OHzS working potential at 10 mA cm<sup>-2</sup>.

| Catalysts                           | Electrolyte                                   | E <sub>10</sub> (mV)    | Stability | Reference |
|-------------------------------------|-----------------------------------------------|-------------------------|-----------|-----------|
| MoO <sub>2</sub> /Co-NF             | 1.0 M KOH+0.5 M N <sub>2</sub> H <sub>4</sub> | 35                      | 50 h      | This work |
| PW-Co <sub>3</sub> N                | 1.0 M KOH+0.1 M N <sub>2</sub> H <sub>4</sub> | 358                     | 20 h      | [5]       |
| CoSe <sub>2</sub>                   | 1.0 M KOH+0.5 M N <sub>2</sub> H <sub>4</sub> | 164                     | 14 h      | [6]       |
| Ni NCNAs                            | 1.0 M KOH+0.3 M N <sub>2</sub> H <sub>4</sub> | 79 (E <sub>50</sub> )   | N/A       | [12]      |
| Mo-Ni <sub>3</sub> N/Ni/NF          | 1.0 M KOH+0.1 M N <sub>2</sub> H <sub>4</sub> | 55                      | 10 h      | [13]      |
| Ni <sub>3</sub> N-Co <sub>3</sub> N | 1.0 M KOH+0.1 M N <sub>2</sub> H <sub>4</sub> | 71                      | 20 h      | [14]      |
| RP-CPM                              | 1.0 M KOH+0.3 M N <sub>2</sub> H <sub>4</sub> | 353                     | 20 h      | [15]      |
| Ni <sub>2</sub> P/NF                | 1.0 M KOH+0.5 M N <sub>2</sub> H <sub>4</sub> | 1.0V(E <sub>500</sub> ) | 10 h      | [16]      |
| Ni-C HNSA                           | 1.0 M KOH+0.1 M N <sub>2</sub> H <sub>4</sub> | 140 (E <sub>50</sub> )  | 30 h      | [17]      |

## Reference

- [1] Y.Y. Guo, P.F. Yuan, J.A. Zhang, H.C. Xia, F.Y. Cheng, M.F. Zhou, J. Li, Y.Y. Qiao, S.C. Mu, Q. Xu, *Adv Funct Mater*, 28 (2018).
- [2] X.J. Liu, J. He, S.Z. Zhao, Y.P. Liu, Z. Zhao, J. Luo, G.Z. Hu, X.M. Sun, Y. Ding, *Nat Commun*, 9 (2018).
- [3] J.P. Lai, B.L. Huang, Y.G. Chao, X. Chen, S.J. Guo, *Adv Mater*, 31 (2019).
- [4] Z.Y. Chen, Y. Song, J.Y. Cai, X.S. Zheng, D.D. Han, Y.S. Wu, Y.P. Zang, S.W. Niu, Y. Liu, J.F. Zhu, X.J. Liu, G.M. Wang, *Angew Chem Int Edit*, 57 (2018) 5076-5080.
- [5] Y. Liu, J.H. Zhang, Y.P. Li, Q.Z. Qian, Z.Y. Li, Y. Zhu, G.Q. Zhang, *Nat Commun*, 11 (2020).
- [6] J. Qi, W. Zhang, R. Cao, *Adv Energy Mater*, 8 (2018).
- [7] N. Yao, P. Li, Z.R. Zhou, Y.M. Zhao, G.Z. Cheng, S.L. Chen, W. Luo, *Adv Energy Mater*, 9 (2019).
- [8] C.R. Zhu, A.L. Wang, W. Xiao, D.L. Chao, X. Zhang, N.H. Tiep, S. Chen, J.N. Kang, X. Wang, J. Ding, J. Wang, H. Zhang, H.J. Fan, *Adv Mater*, 30 (2018).
- [9] S.W. Niu, Y.Y. Fang, J.B. Zhou, J.Y. Cai, Y.P. Zang, Y.S. Wu, J. Ye, Y.F. Xie, Y. Liu, X.S. Zheng, W.G. Qu, X.J. Liu, G.M. Wang, Y.T. Qian, *J Mater Chem A*, 7 (2019) 10924-10929.
- [10] W.L. Liang, P.Y. Dong, Z.C. Le, X.Y. Lin, X.Y. Gong, F.Y. Xie, H. Zhang, J. Chen, N. Wang, Y.S. Jin, H. Meng, *Acs Appl Mater Inter*, 13 (2021) 39470-39479.
- [11] X. Liu, K. Ni, C.J. Niu, R.T. Guo, W. Xi, Z.Y. Wang, J.S. Meng, J.T. Li, Y.W. Zhu, P.J. Wu, Q. Li, J. Luo, X.J. Wu, L.Q. Mai, *Acs Catal*, 9 (2019) 2275-2285.
- [12] Z.B. Liang, T.J. Qiu, S. Gao, R.Q. Zhong, R.Q. Zou, *Adv Energy Mater*, (2021).
- [13] Y. Liu, J.H. Zhang, Y.P. Li, Q.Z. Qian, Z.Y. Li, G.Q. Zhang, *Adv Funct Mater*, 31 (2021).
- [14] Q.Z. Qian, J.H. Zhang, J.M. Li, Y.P. Li, X. Jin, Y. Zhu, Y. Liu, Z.Y. Li, A. El-Harairy, C. Xiao, G.Q. Zhang, Y. Xie, *Angew Chem Int Edit*, 60 (2021) 5984-5993.
- [15] Y.P. Li, J.H. Zhang, Y. Liu, Q.Z. Qian, Z.Y. Li, Y. Zhu, G.Q. Zhang, *Sci Adv*, 6

(2020).

[16] C. Tang, R. Zhang, W.B. Lu, Z. Wang, D.N. Liu, S. Hao, G. Du, A.M. Asiri, X.P. Sun, *Angew Chem Int Edit*, 56 (2017) 842-846.

[17] Y. Zhu, J.H. Zhang, Q.Z. Qian, Y.P. Li, Z.Y. Li, Y. Liu, C. Xiao, G.Q. Zhang, Y. Xie, *Angew Chem Int Edit*, (2021).
